# Supplementary material
Source: bioRxiv or medRxiv preprint supplement (https://www.biorxiv.org/content/biorxiv/early/2020/07/04/2020.07.03.186403/DC1/embed/media-1.pdf)
Supplement: Supplementary file [file media-1.pdf]

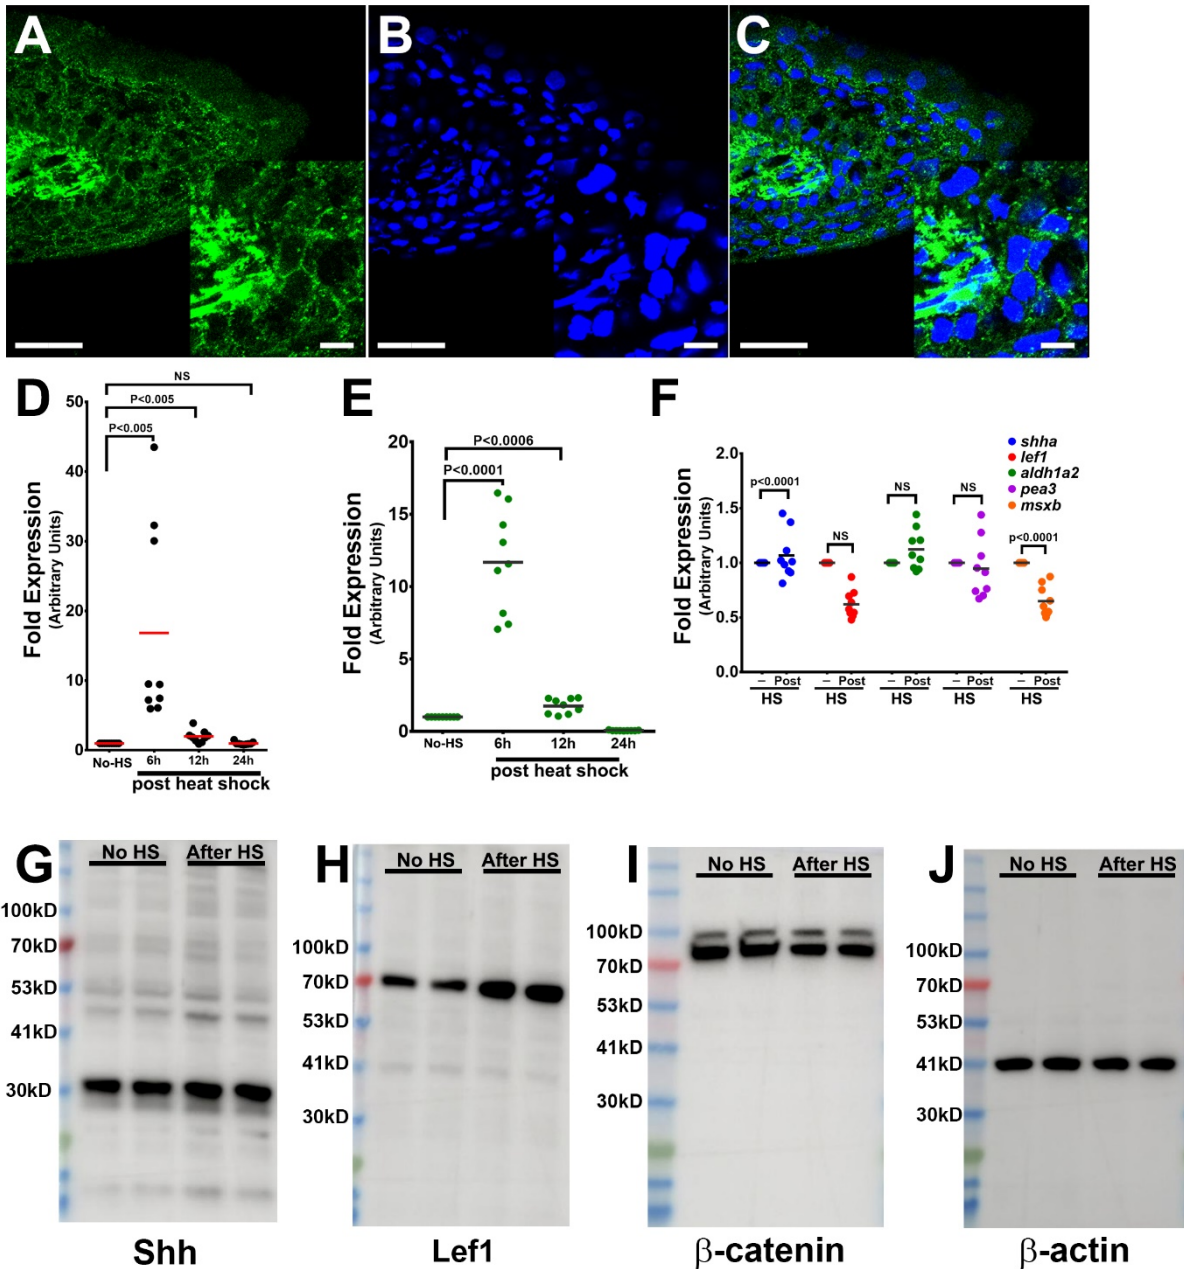

## Yi et al., Supplemental Figure 1

1

### 2 Supplementary Figure 1

3 (A) Confocal image of immunohistochemistry staining for GFP expression in a cross section  
 4 of the distal tip of the adult fin after heat shock induction of *kcnk5b*-GFP in a fish harboring  
 5 the Tg[*hsp70:kcnk5b*-GFP] transgene. The left inset is an enlarged view of the expression of  
 6 the transgene in the fin. (B) Confocal image of DAPI-stained nuclei of the same confocal  
 7 section in panel A. (C) Overlay of the confocal GFP and DAPI images. (D) qRT-PCR results  
 8 for *kcnk5b* expression from the transgenic fish line Tg[*hsp70:kcnk5b*-GFP] at the indicated  
 9 time points relative to the single heat-shock pulse. (E) qRT-PCR results for GFP expression

10 from the transgenic fish line Tg[*hsp70:kcnk5b*-GFP] at the indicated time points relative to the  
11 single heat-shock pulse. (F) qRT-PCR results for the indicated genes in the caudal fin without  
12 (Pre) and after (post) 24 hours after a single heat-shock pulse Tg[*hsp70:kcnk5b*-GFP]. (G)  
13 Example blot for Shh expression in adult fins with or without heat-shock induction of the  
14 Tg[*hsp70:kcnk5b*-GFP] transgene. (H) Example blot for Lef1 expression in adult fins with or  
15 without heat-shock induction of the Tg[*hsp70:kcnk5b*-GFP] transgene. (I) Example blot for  $\beta$ -  
16 catenin expression in adult fins with or without heat-shock induction of the Tg[*hsp70:kcnk5b*-  
17 GFP] transgene. (J) Example blot for  $\beta$ -actin expression in adult fins with or without heat-  
18 shock induction of the Tg[*hsp70:kcnk5b*-GFP] transgene.

19

20

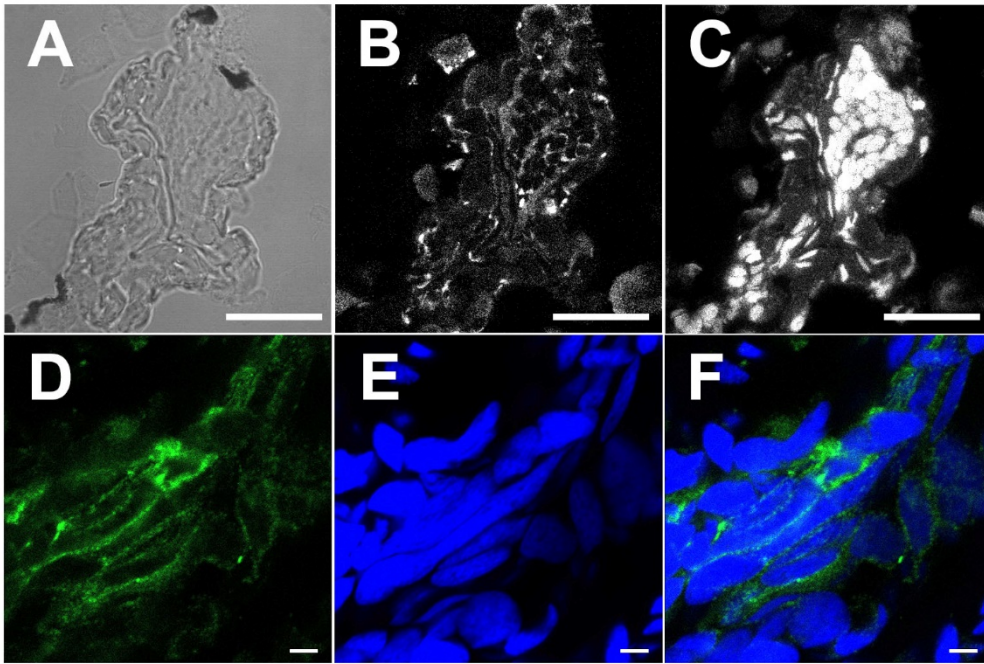

## 21 Yi et al., Supplemental Figure 2

21

22 **Supplementary Figure 2: Expression of Kcnk5b-GFP in transgenic Tg[hsp70:kcnk5b-**  
23 **GFP] larva after single heat shock.**

24 (A) Representative bright field cross section through the mid-section of heat-shocked transgenic  
25 zebrafish larva. (B) Immunohistochemical staining for GFP of the same cross section in panel  
26 A. (C) DAPI staining of the same cross section in panel A. (D) Representative confocal image  
27 of immunohistochemical staining for GFP in heat-shocked transgenic zebrafish larva showing  
28 membranous staining of Kcnk5b-GFP. (E) DAPI staining of the same confocal section in panel  
29 D. (F) Merged image of panels D and E. Scale bars equal 40  $\mu\text{m}$  (A-C) and 5  $\mu\text{m}$  (D-F).

30

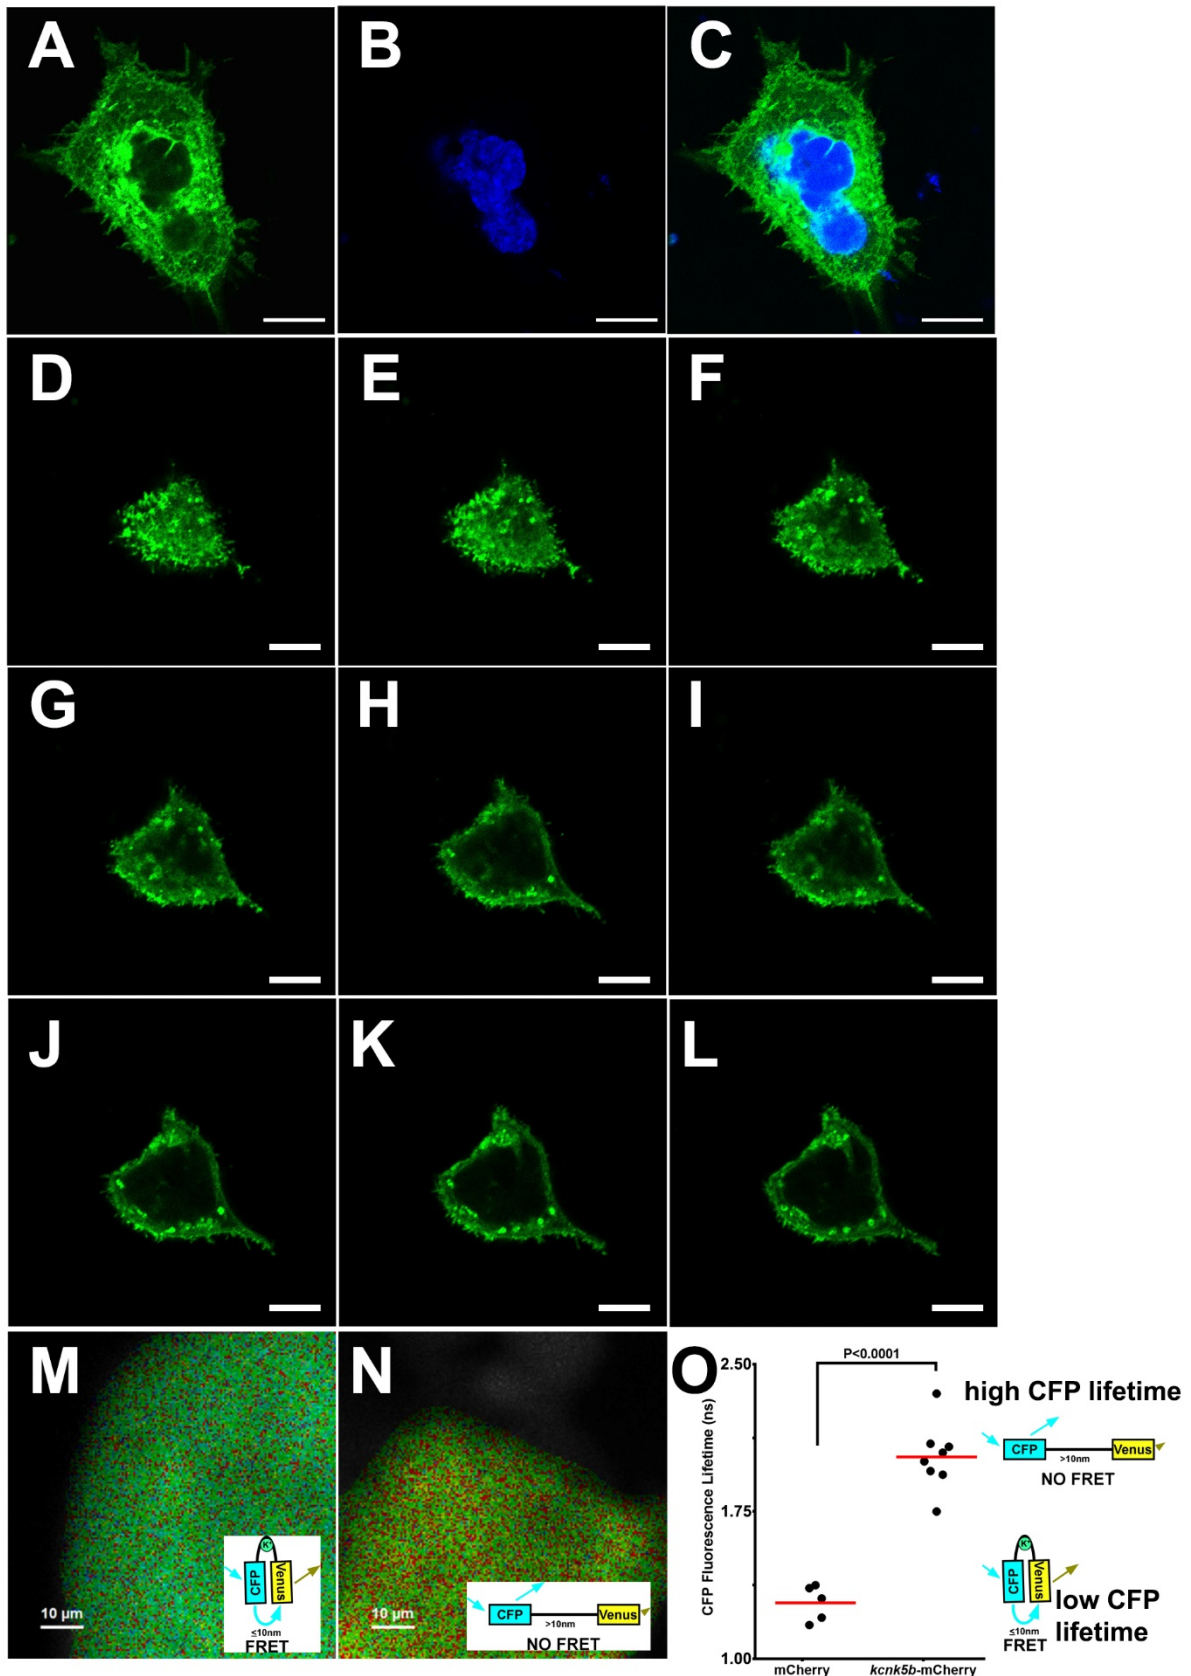

Yi et al., Supplemental Figure 3

32 **Supplementary Figure 3: Expression and activity of Kcnk5b-GFP in transfected**  
33 **HEK293T cells.**

34 (A) Confocal image of through an immunocytochemical staining of a HEK293T cell  
35 transfected with zebrafish *kcnk5b*-GFP transgene (B) DAPI staining of the same cell in panel  
36 A. (C) Merged panels A and B. (D-L) Serial confocal cross sections for GFP in a live  
37 HEK293T cell from its surface (D) through to a mid-section of the cell (L) after transfection  
38 with the zebrafish *kcnk5b*-GFP transgene. (M) FRET-FLIM image after measuring the life  
39 time of CFP of the K<sup>+</sup> FRET reporter KIRIN in a cell transfected with a control plasmid only  
40 expressing mCherry. The inset image of the confirmation of the FRET reporter depicting how  
41 FRET occurs. (N) FRET-FLIM image after measuring the life time of CFP of the K<sup>+</sup> FRET  
42 reporter KIRIN in a cell transfected with a plasmid expressing *kcnk5b*-mCherry. The inset  
43 image of the confirmation of the FRET reporter depicting how FRET do not occur. (O) The  
44 graphed assessments of the changes in CFP lifetime in the control mCherry-expressing cells  
45 and the cells expressing *kcnk5b*-mCherry. The diagrams to the right of the graph depict the  
46 conformational changes that result in the values of the lifetimes of CFP.

47

# A

Kcnk5b  
-----  
MALRAGRILLWFGQVLRVSRRLQGLWSRRSSLLCLSNSQEHDDQGTCTYSRNRCPKTHRQQHCPYPPFPDCCCAFPGDKRGHEPLSRRLVAMKR  
Kcnk9

Kcnk5b  
MADKGPILTSVII FYLSIGAAI FQILEE PNLNSAVDDYKNTNNLLKYPCLSKVELGEIIEVVAEATGQGVTVTKEAQFNNWNWENAVIFAATVITTIYGNVAPKTT  
YL +GAA+F LE + + + L KY +S++ ++ ++ EA V W + + FA TVITTIYGY+ AP T  
QNVRTL SLIVCTFTYLLVGAAVFDALESDFEMREKEQLEAEEKRLQ GKYN-ISEDDYKQLQTIIMEAEPHRAGV-----QWKFAGSFYFAITVITTIYGHAAAPGTD  
Kcnk9

Kcnk5b  
GGRLFCILYGLGCIPLCLTWISLG---TFFGSRTRKRLSQQLLHSGLNVRKVVQFICTIVFLLWGFVHLII PAFVEMFFENWYILEGLYFSFTTLTIVGFGDYVA-GVD  
G+ FC+ Y + GIPL L LG TF KR+ + G+ + +V + + + L I A F +E+W++ + Y+ F TLTT+GFGD+VA +  
AGKAFCMFYAVLGIPLVMFQSLGERMNTFVKYLLKRIKCC---CGMRITEVSMENMVVGFSCMGILCI GAAAFSQVEDWSFFQSYYYCFITLTTIGFGDFVALQKN  
Kcnk9

Kcnk5b  
PSVNYPTLYRFFVQLWYIYGLAWLSLFFSWNVHMVVEAHKVLKRRMRRLRPTDDVPEKKEVKTKPKPPRSQVIDI FEFMSEKVEDYSDVIRAI GADEKRRKKQEE  
++ LY F ++I +GL + F + V  
KALQKKPLYVAFSFMYLVLVGLVIGAPLNLVVLRLTMSSEDEERRDAEERASLAGNRS SMI IHIQEDTLQRSRRRREQQNRNRYRPEVITLQSVCSMHHYSHEFGSSVGL  
Kcnk9

Kcnk5b  
LARSKSCDLLQG LVIELDH RLQRRFVSANMCMASIDESVDGLNINNCKQEDD TLTKVRHKDQKVNREANPARCAWDSRSDPSIFQSSTVTNSTNRGSRFVSK  
GLGLGGGGGAFPPQNSFGSQLSPHYHHYHSTVSYRI EESISPTLKNFSLPSPISSISPLGHSFAENL-----  
Kcnk9

Kcnk5b  
VSEDRLGKRKSG  
RL+ +RKS  
----RLMRRRKS  
Kcnk9

# B

MKFPTEPRKPGNWNPPVFPVQINLVPPKVKVQPGMLQSSLVQASVATMQNPM  
Kcnk10a

Kcnk5b  
-----MADKGPILTSVII FYLSIGAAI FQILEE PNLNSAVDDYKNTNNLLKYPCLSKVELGEIIEVVAEATGQGVTVTKEA  
G +F+ LE+ D K L K+PC++ + L E+I+ +A GV+ +  
GCSLPRLSVSRPASMVASMEAVADGSALLTVMKWKTVLAVFVVVAYLVAGGLVFRALQHFERYQKDSITLKKAAFLKHPCVTPDELEELIKHSVDVAVNGVSPIGDT  
Kcnk10a

Kcnk5b  
QFNNWNE--NAVIFAATVITTIYGNVAPKTTGGRLFCILYGLGCIPLCLTWIS---ELGFFGSRTRKRLSQQLL--HSGLNVRKVVQFICTIVFLLWGFVHLII PAF  
+N+ +W+ ++ FA TVITTIYGN+AP T GG+FCILY + GIPL ++ +LGI FG ++ ++ H+ ++ K++ T++F+L G ++ + IPA  
SYNSSHWDLGSSFFAGTVITTIYGNVAPKTTGGRIFCILYAFGIPLFGFLLAGVGDQLGTIPGKSIKVEKFRKRNHNSQTKIRVASTLLFI LAGCILFVTIPAI  
Kcnk10a

Kcnk5b  
VEMFFENWYILEGLYFSFTTLTIVGFGDYVAGVDPVNYPTLYRFFVQLWYIYGLAWLSLFFSWNVHMVVEAHKVLKRRMRRLRPTDDVPEKKEVKTKPKPPRSQV  
+F E WI LE +YF TLTTVG GDYVAG + + Y YR V WI +GLA+ + S M+ + +VL K+  
IFKHIEGWIGLEAIYFVITLTTVIGDYVAGGNRRIEYRKYRPLWFVILVGLAYFAAVLS---MIGDWLVL SKKTKMEVGEIKAHAAEWKANVRAELRETRRRLS  
Kcnk10a

Kcnk5b  
DIFEFMSEKVEDYSDVIRAI GADEKRRKKQEEELARSKSCDLLQG LVIELDH RLQRRFVSANMCMASIDESVDGININNCKQEDD TLTKVRHKDQKVNREANF  
VEVHDKLQRAATIRSMERRQLGFDQRAHSLDMLSPERRAAFNSLDATNFKTSQESIDTLKNNLRLRVEQNEHRRSDPSQAYSEDNINFLGSVTKLAKRKNRDLKKN  
Kcnk10a

Kcnk5b  
ARCAWDSRSDPSIFQSSTVTNSTNRGSRFVSKVSEDRLGKRKSG  
LDDGRKALDSFCDTPMDEKKEAEDEELEKEVNI SLTNLPLFVESPKNQNGFVPLPPQTKKEETETKLEDKEFRLQVDP  
Kcnk10a

## Yi et al., Supplemental Figure 4

49 **Supplementary Figure 4: Amino acid comparison of Kcnk5b with Knck9 or with**  
50 **Kcnk10**

51 Comparison between zebrafish amino acid sequences from Kcnk5b (blue) and Kcnk10b  
52 (black) show conserved (red letter) and similar properties (red plus sign) amino acids.

53 Yellow-highlighted letters indicate calcineurin binding site, and green-highlighted letters  
54 indicate the site of post-translational modification by calcineurin.

55

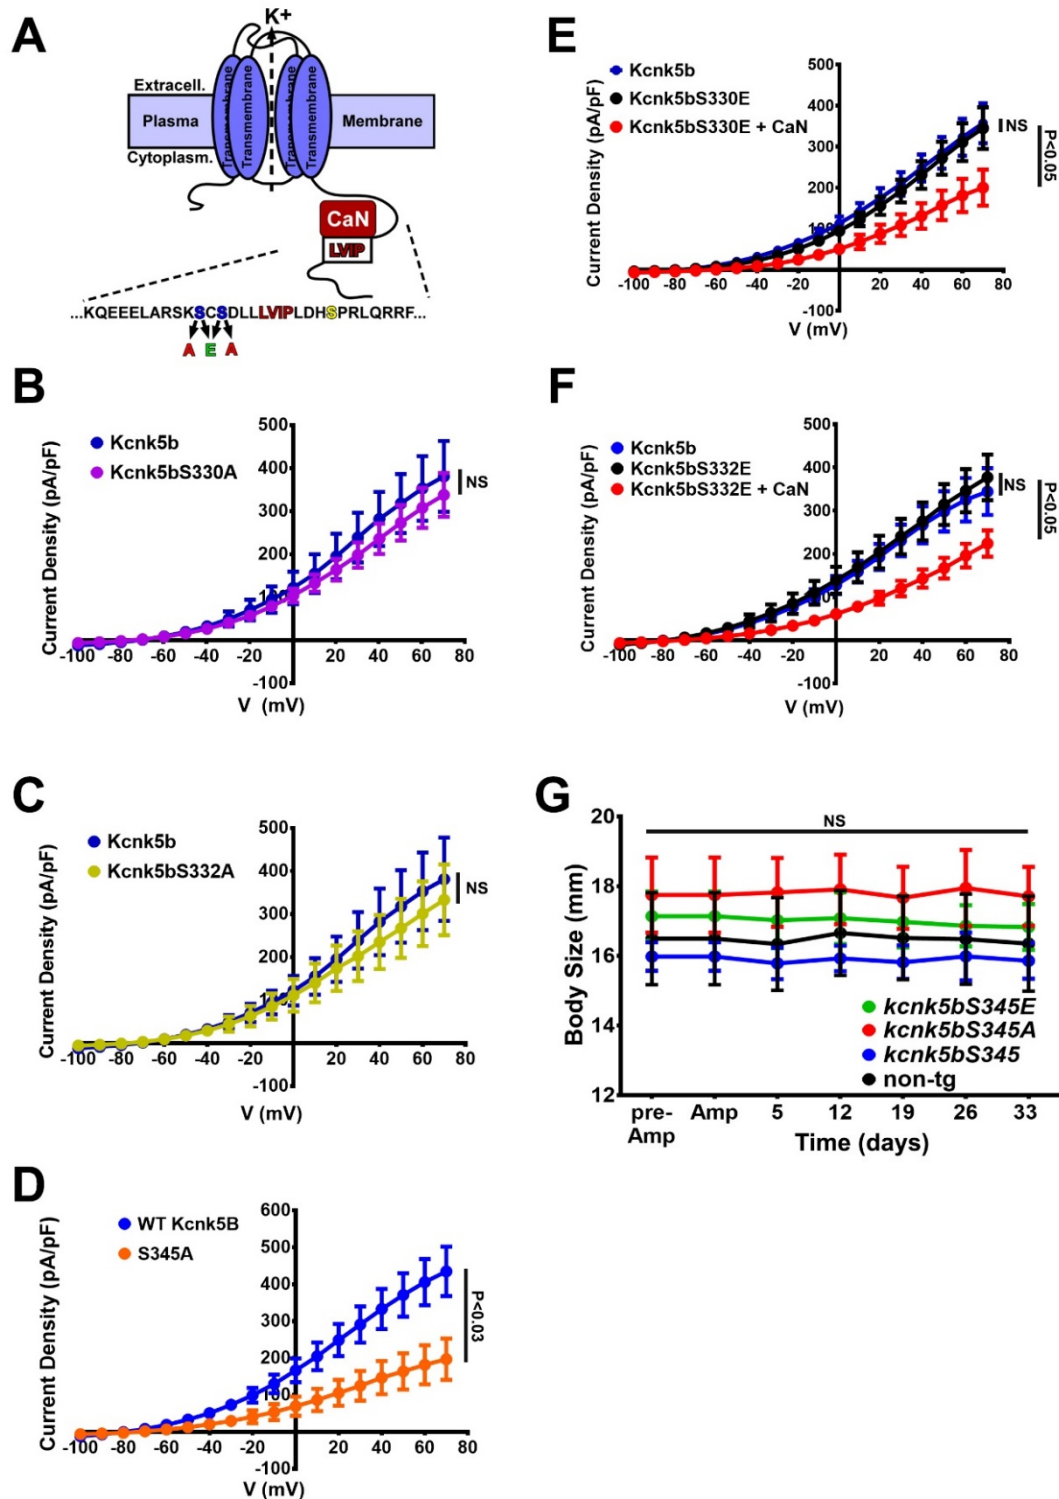

Yi et al., Suppl Fig. 5

56

57 **Supplementary Figure 5: Activity measurements of Kcnk5b Serine mutant channels**

58 (A) Diagram of Kcnk5b channel showing proposed Serine345 calcineurin dephosphorylation  
 59 site (yellow) adjacent the calcineurin-interaction site (LVIP). Two other serines (blue) were  
 60 substituted with alanines or glutamic acids to mimic dephosphorylation or phosphorylation.



61 **(B)** Electrophysiology measurements of wild-type Kcnk5b (blue) and serine-to-alanine mutant  
62 Kcnk5bS330A (purple). **(C)** Electrophysiology measurement of wild-type Kcnk5b (blue) and  
63 serine-to-alanine mutant Kcnk5bS332A (yellow). **(D)** Electrophysiology measurement of  
64 wild-type Kcnk5b (blue) and serine-to-alanine mutant Kcnk5bS345A (orange). **(E)**  
65 Electrophysiology measurement of wild-type Kcnk5b (blue), serine-to-glutamic acid mutant  
66 Kcnk5bS330E (black) and Kcnk5bS330E plus calcineurin (CaN) (red). **(F)** Electrophysiology  
67 measurement of wild-type Kcnk5b (blue), serine-to-glutamic acid mutant Kcnk5bS332E  
68 (black) and Kcnk5bS332E plus calcineurin (CaN) (red). **(G)** Body length measurements from  
69 tip of the head to the base of the fin for each transgenic fish are represented as averages and  
70 standard deviation.  
71
